# Supplementary material for: Bolometric detection of Josephson radiation
Source: Springer Nature journal article supplement (doi:10.1038/s41565-024-01770-7), 2024-08-22

Fi. 2(b)  
top, main

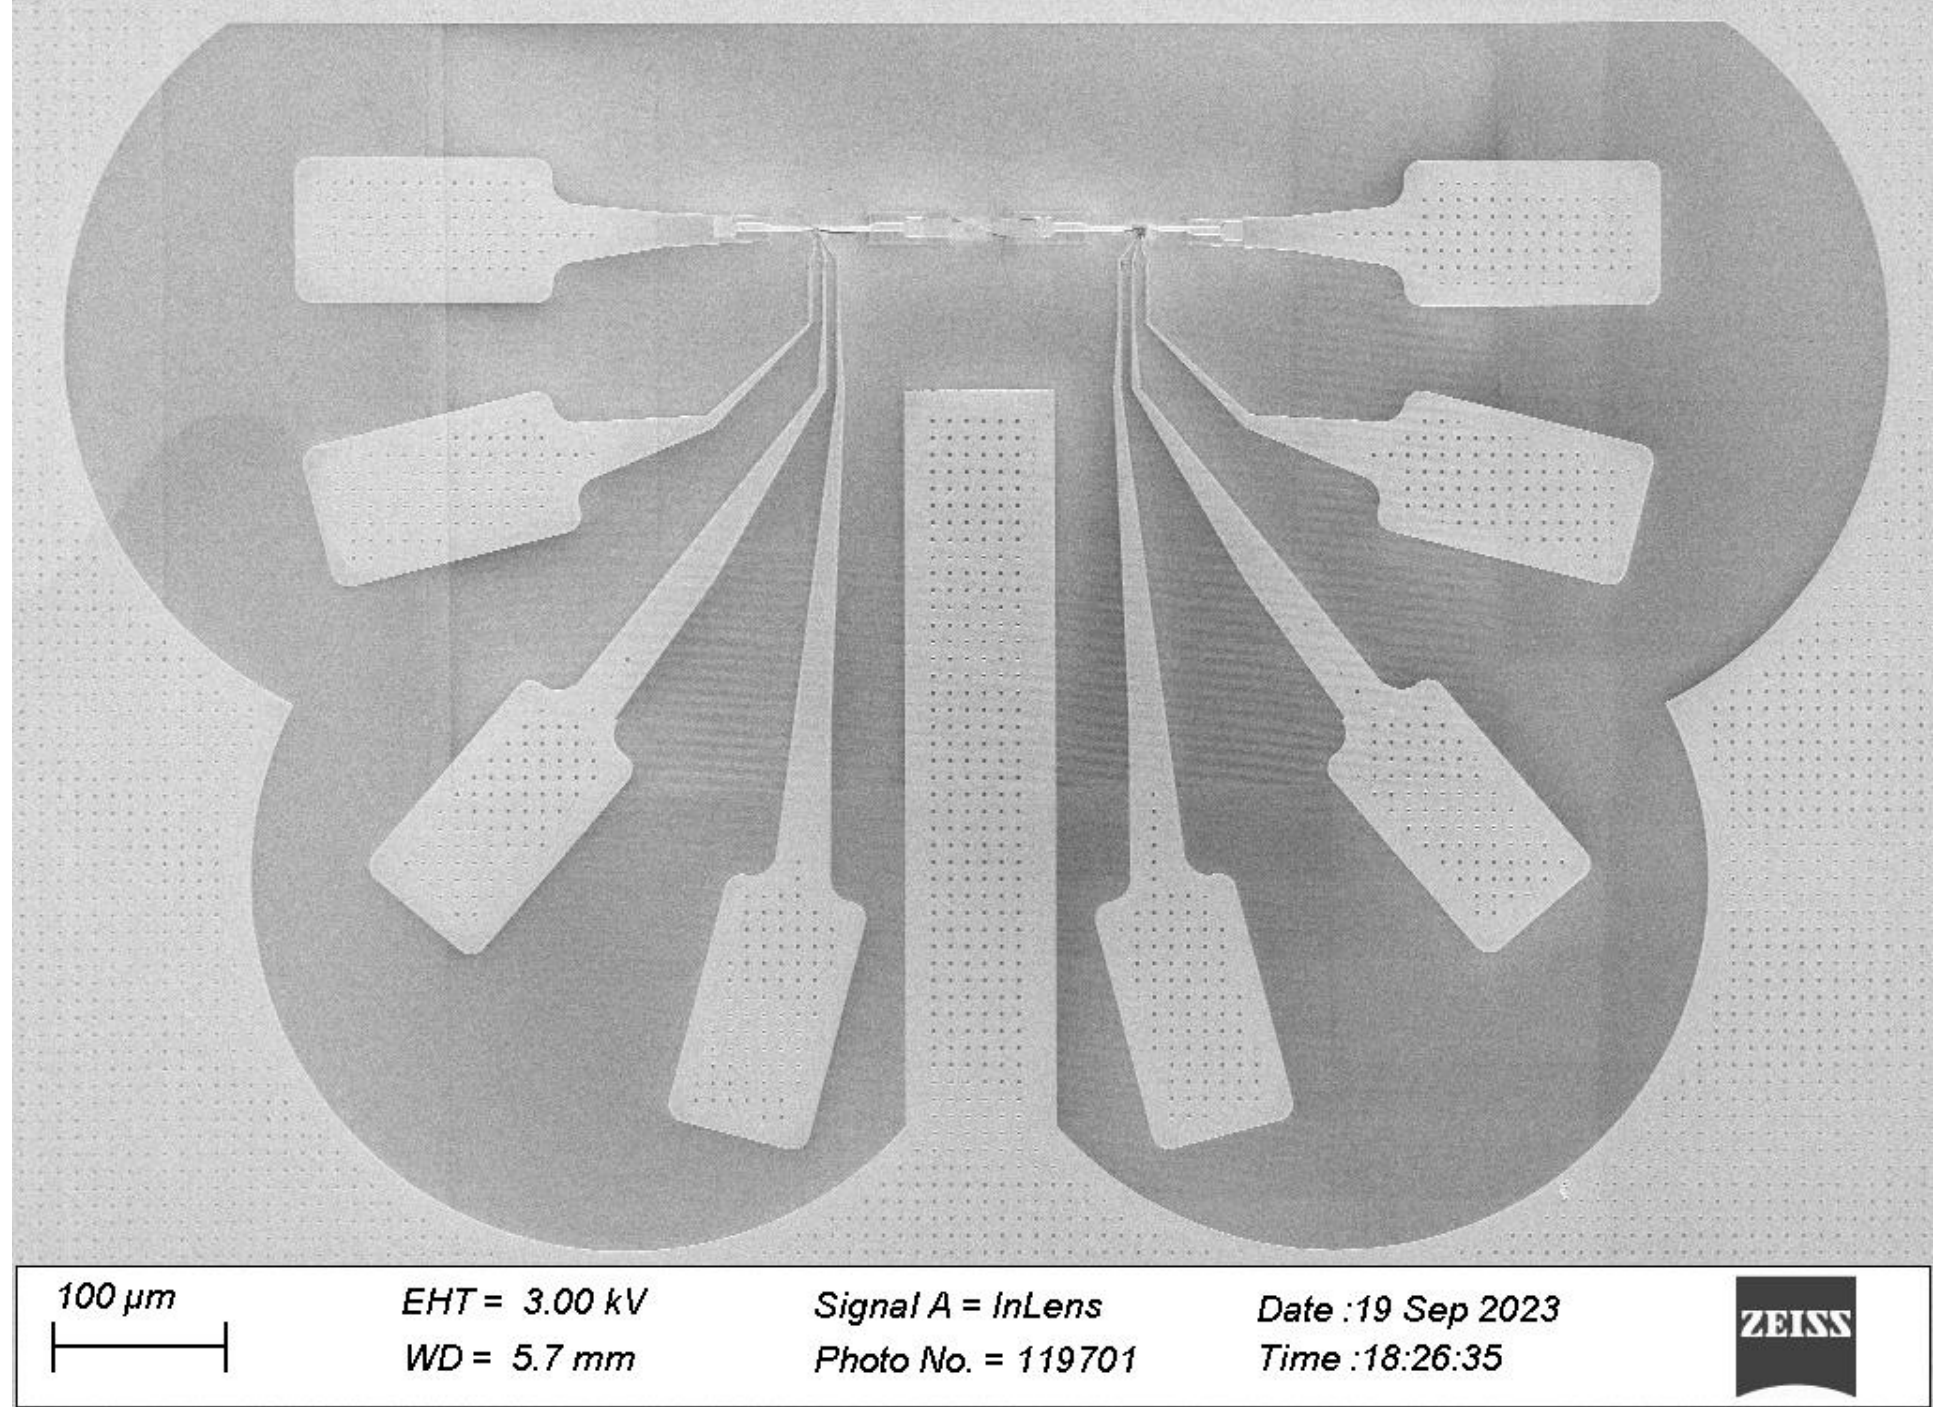

Fi. 2(b)  
bottom, main

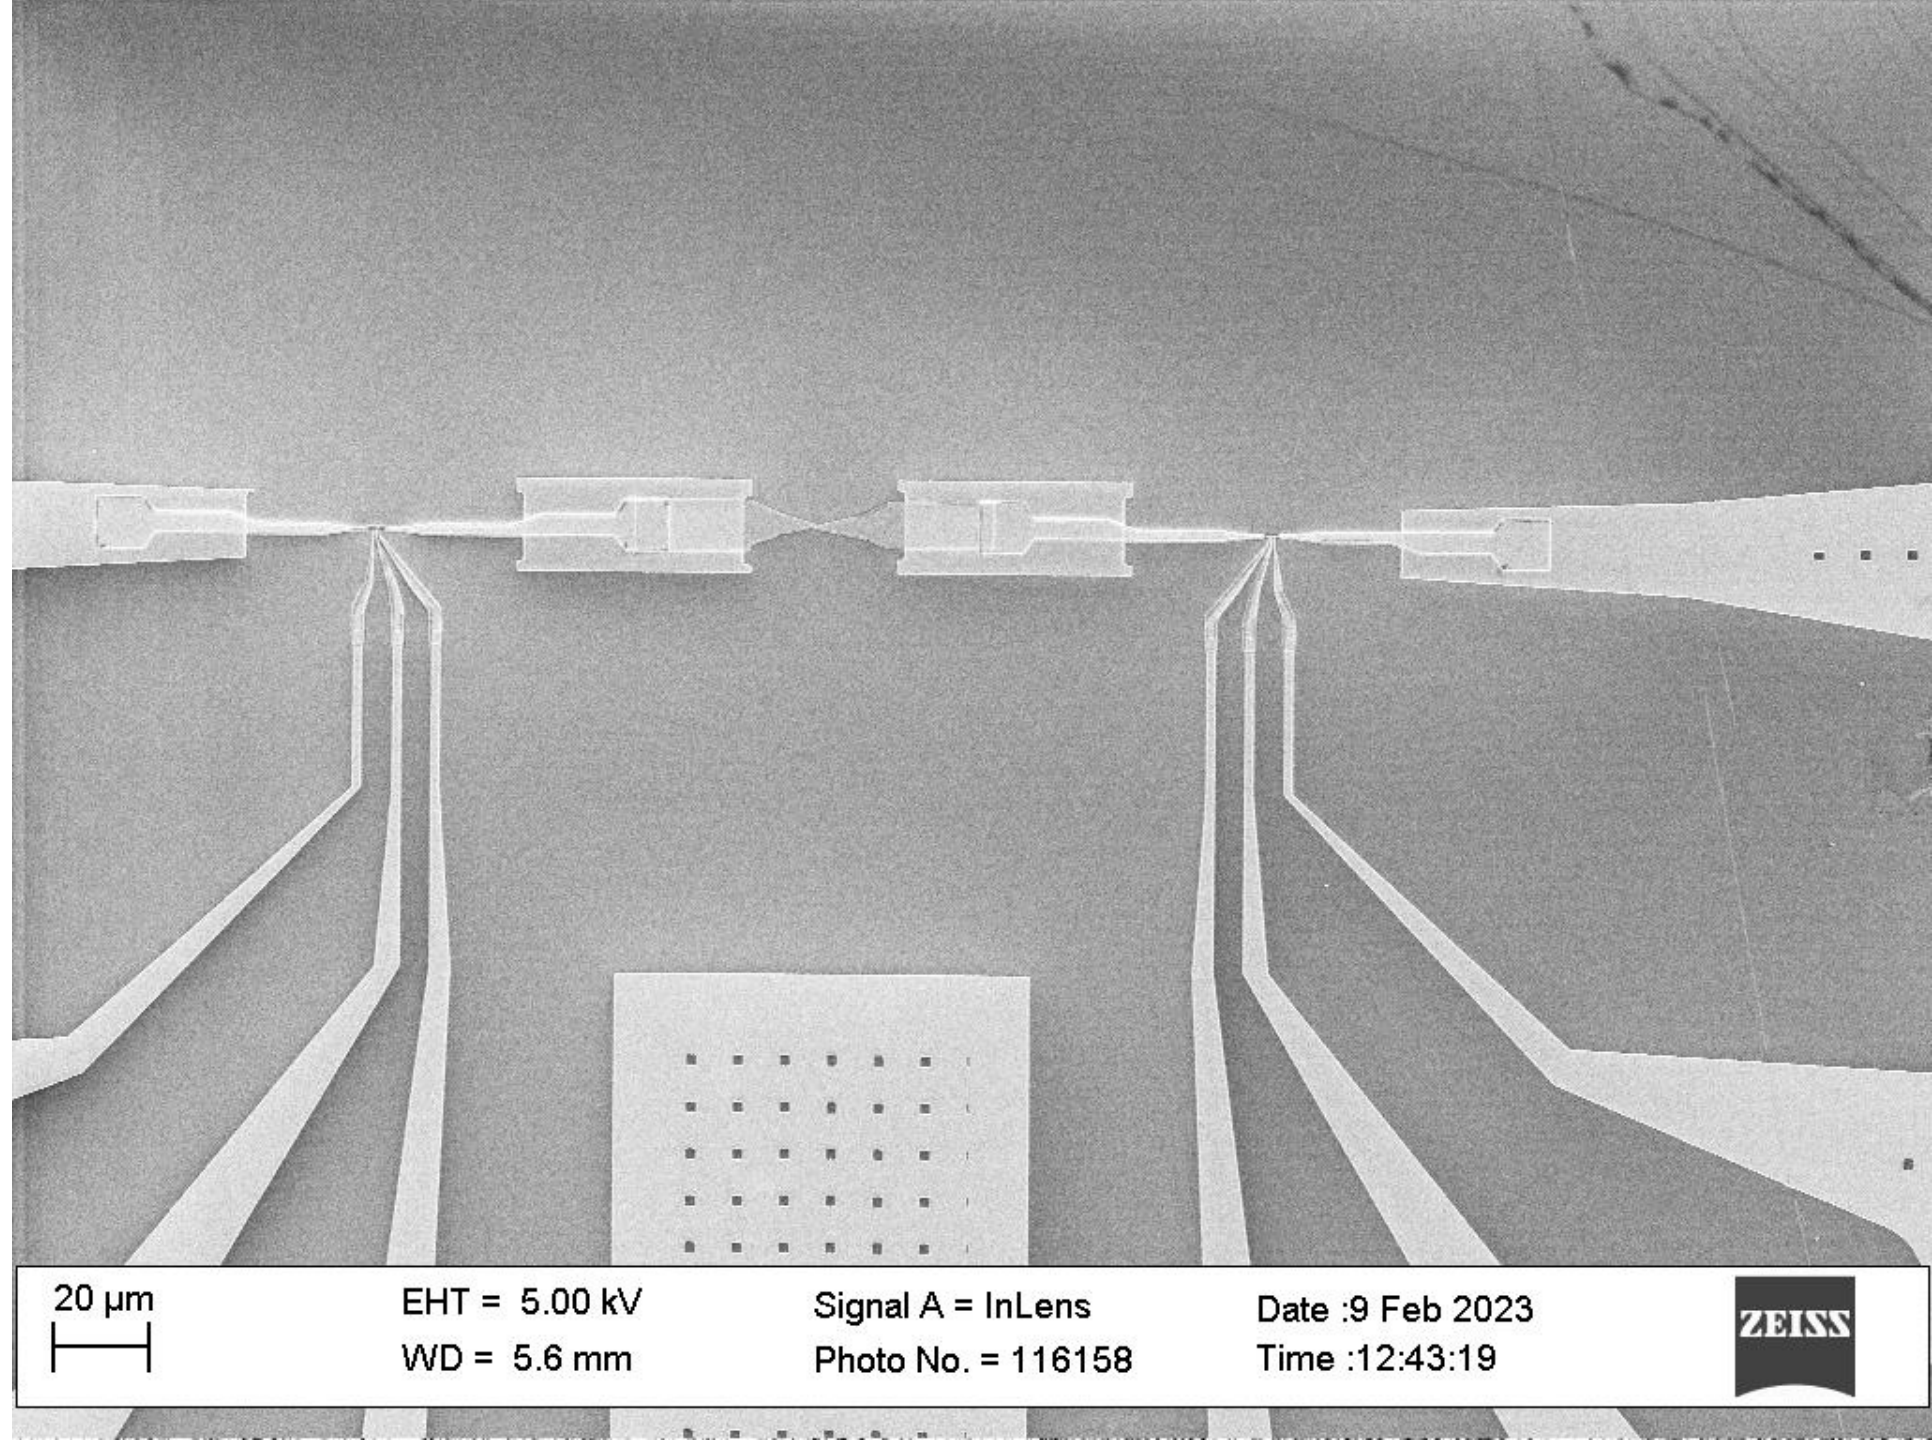

20  $\mu\text{m}$   
|-----|

EHT = 5.00 kV  
WD = 5.6 mm

Signal A = InLens  
Photo No. = 116158

Date :9 Feb 2023  
Time :12:43:19

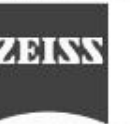

Fi. 2(b)  
bottom,  
Left inset

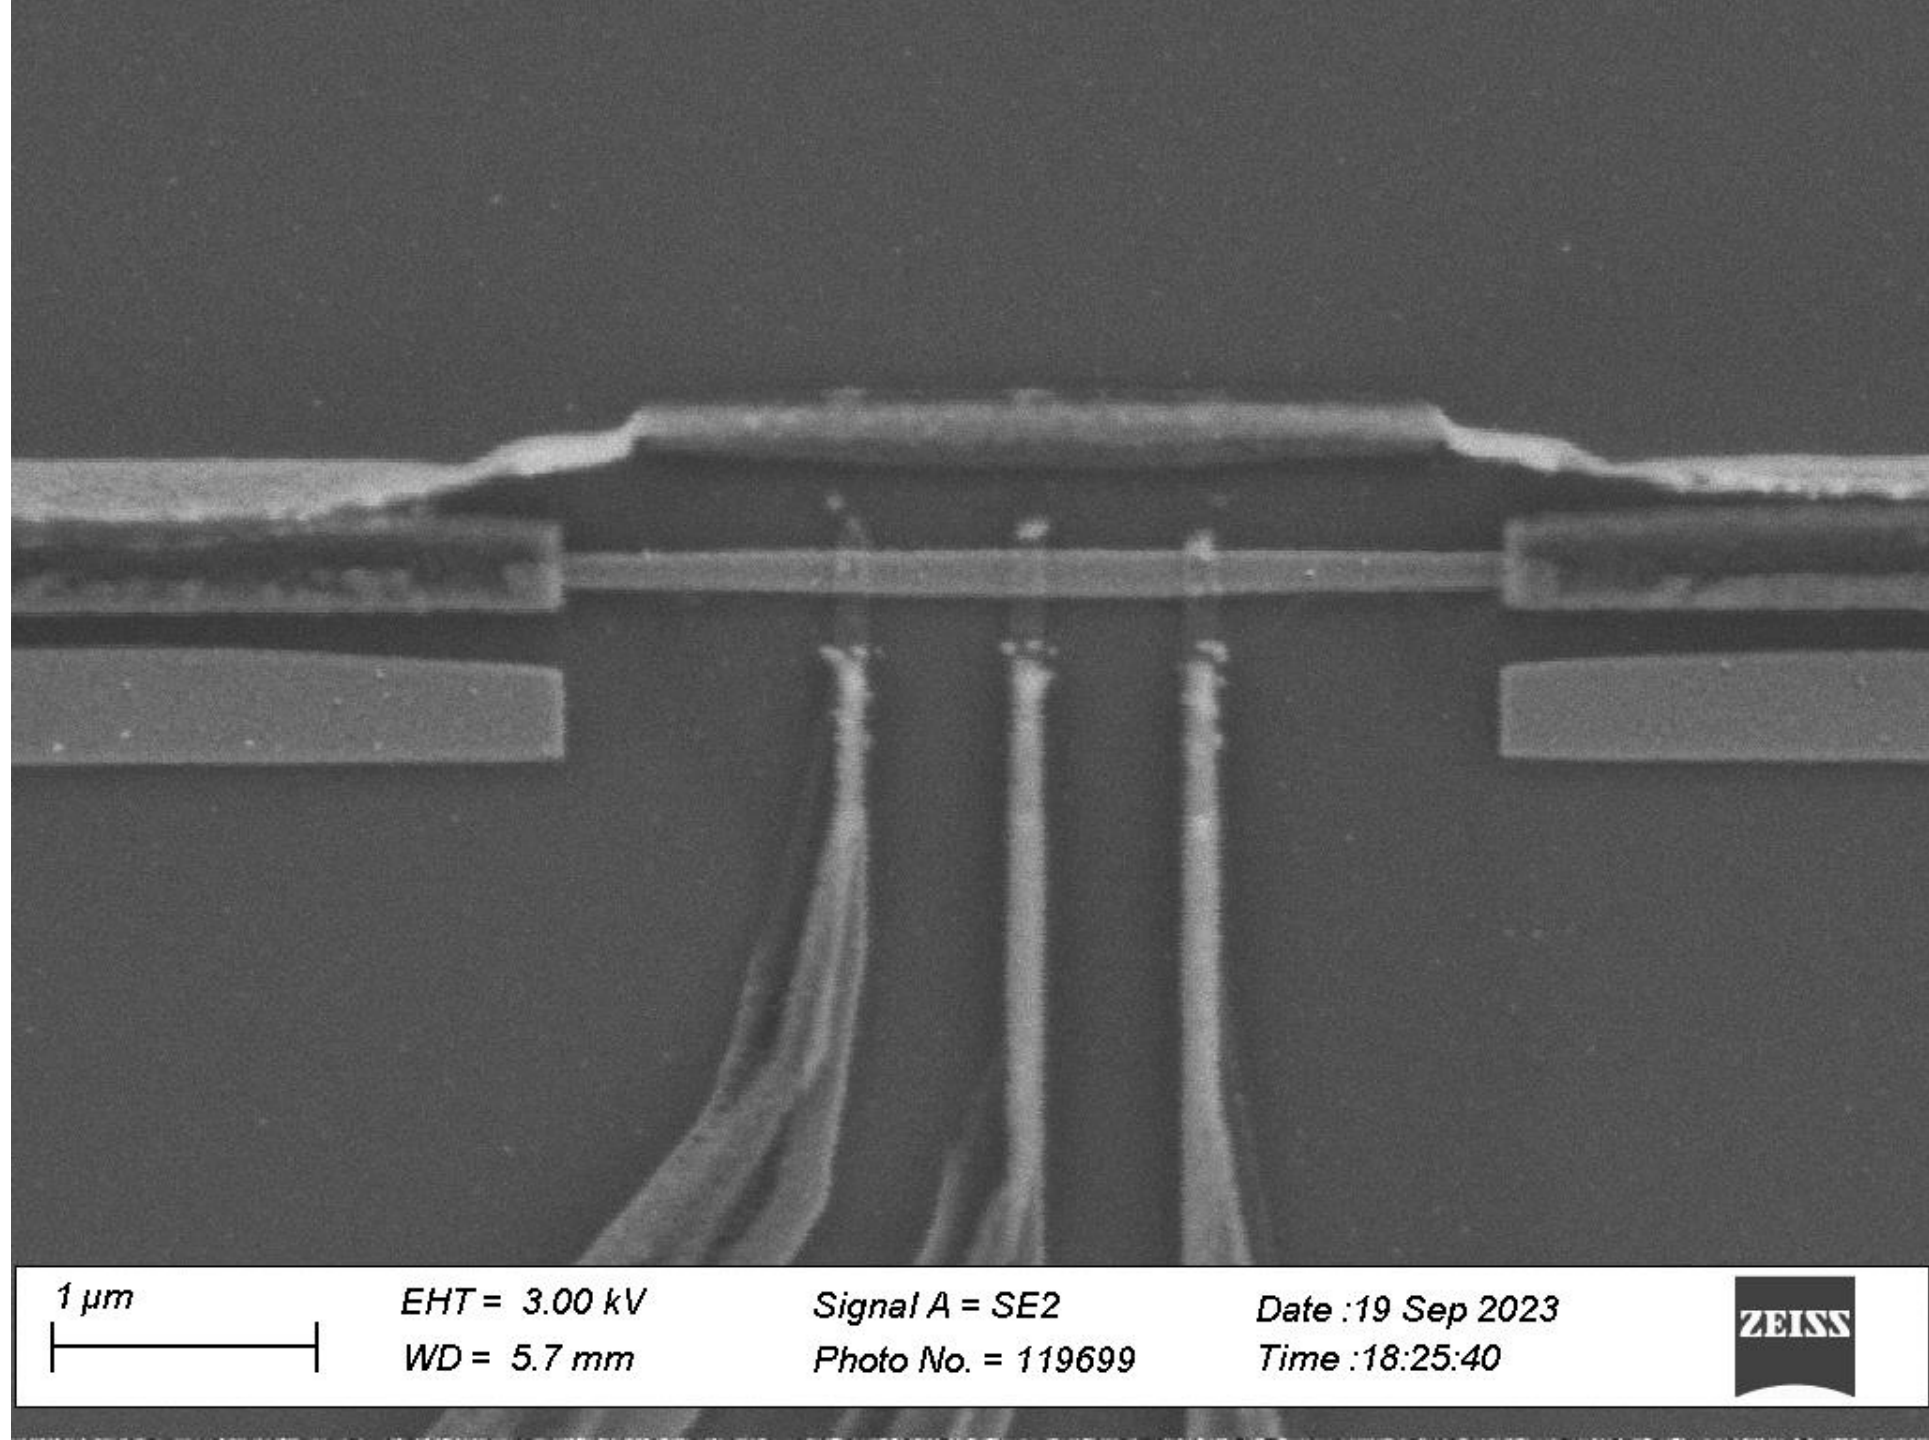



Fi. 2(b)  
bottom,  
right inset

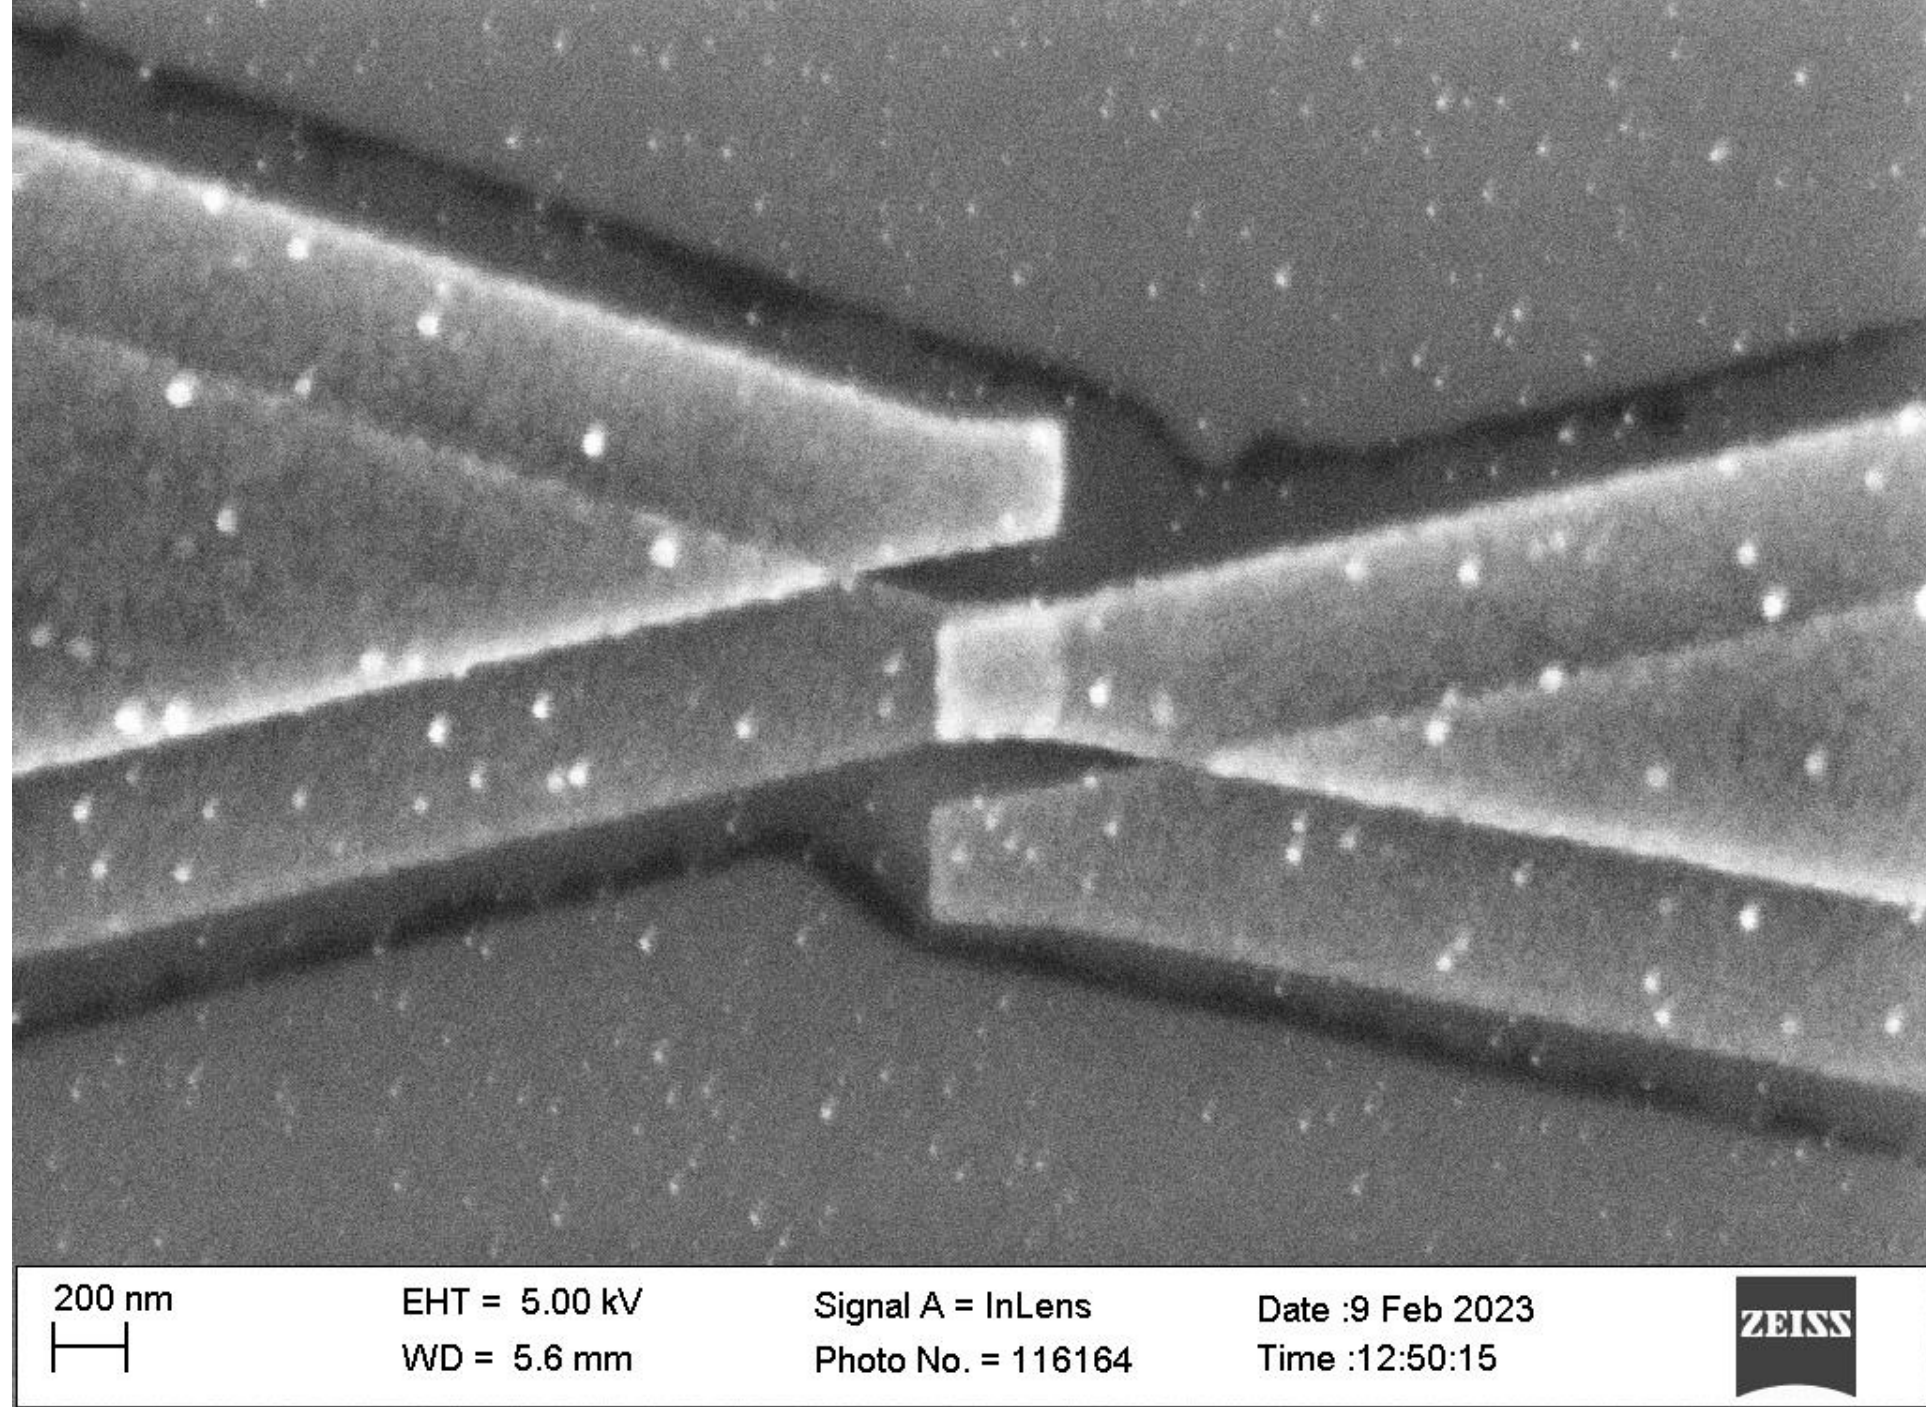

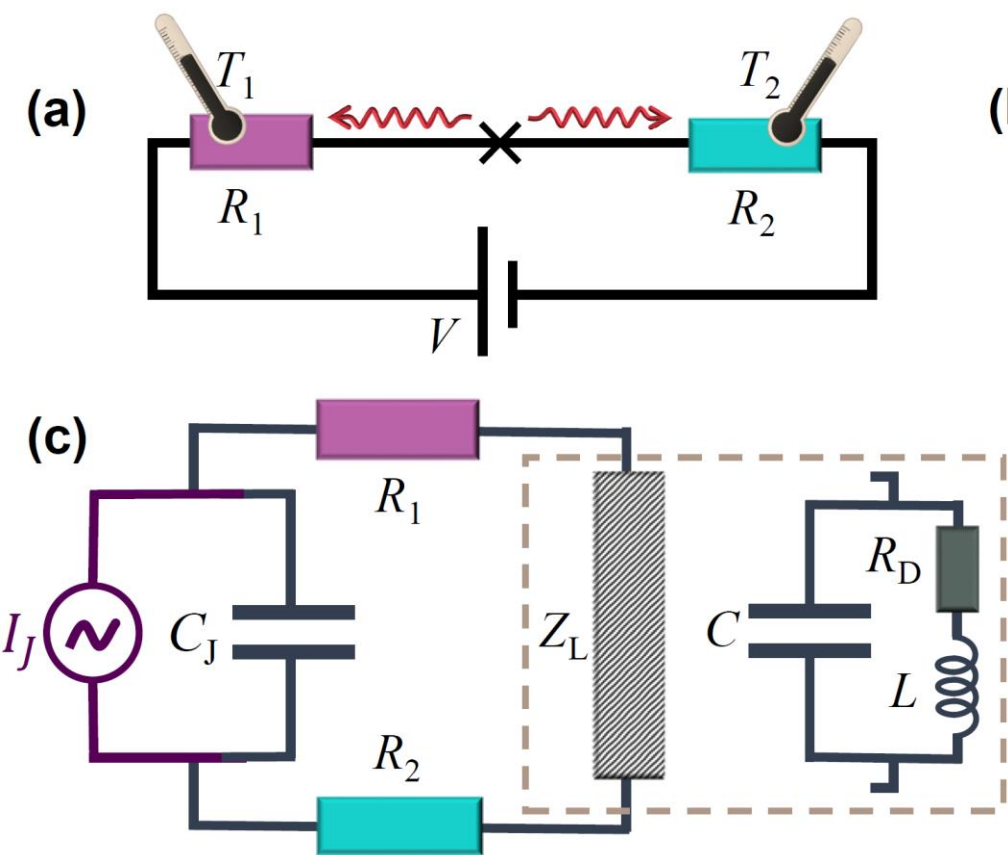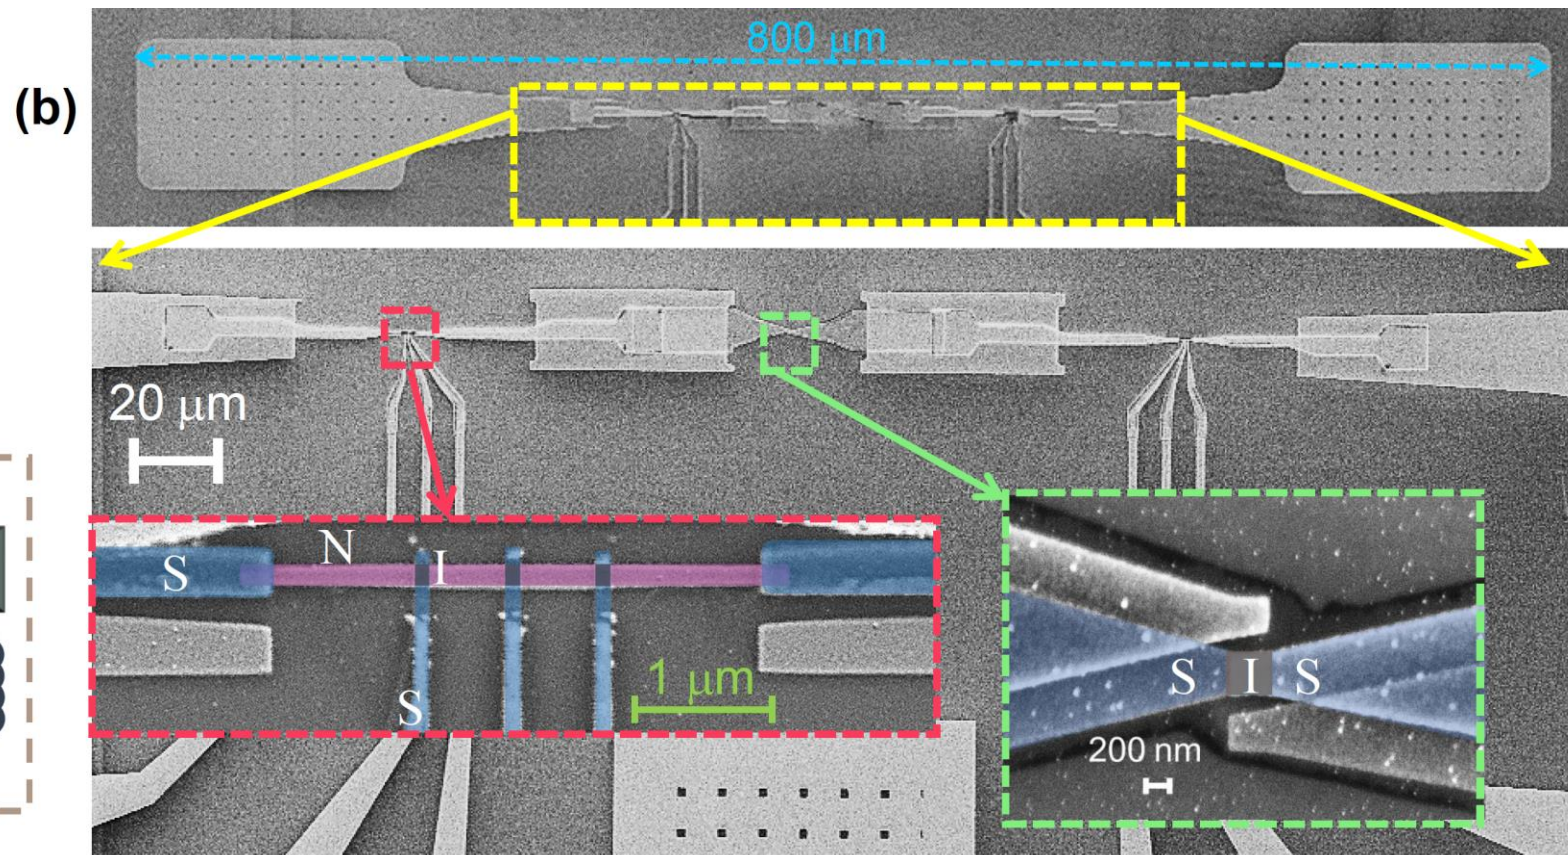

Supplement: MOESM2 [file 41565_2024_1770_MOESM2_ESM.pdf › 41565_2024_1770_MOESM2_ESM.pdf]
